# Supplementary material
Source: PubMed Central journal article supplement (PMC10964493)
Supplement: NIHMS1697296-supplement-Table_E3.pdf [file NIHMS1697296-supplement-Table_E3.pdf]

**TABLE E3.** Characteristics of patients with hereditary  $\alpha$ -tryptasemia (H $\alpha$ T) arranged according to BST level

| Patient No. | Sex | Age | Culprit history     | Grade* | BST level |         |                 | TPSAB1 genotype       | CVD comorbidity | Time to onset of symptoms (min) | Skin symptoms | Unconsciousness | First-line therapy | Previous anaphylaxis | Relaps after finishing previous VIT |         | Initiated VIT                            | Other clinical features of H $\alpha$ T syndrome | Bone marrow assessment |
|-------------|-----|-----|---------------------|--------|-----------|---------|-----------------|-----------------------|-----------------|---------------------------------|---------------|-----------------|--------------------|----------------------|-------------------------------------|---------|------------------------------------------|--------------------------------------------------|------------------------|
|             |     |     |                     |        | slgE i1   | slgE i3 | $\alpha/\alpha$ |                       |                 |                                 |               |                 |                    |                      | No VIT                              | Yes VIT |                                          |                                                  |                        |
| 1           | M   | 40  | <i>Vespinae</i> spp | II     | 7.23      | 3.11    | 3.58            | $\alpha\alpha/\alpha$ | No              | 11-30                           | Yes           | No              | Ah, CS             | No                   | No VIT                              | No      | No                                       | Rejected                                         |                        |
| 2           | M   | 46  | <i>Vespinae</i> spp | III    | 8.42      | <0.35   | 8.21            | $\alpha\alpha/\beta$  | No              | 11-30                           | Yes           | No              | Ah, CS             | No                   | No VIT                              | Yes     | No                                       | Rejected                                         |                        |
| 3           | M   | 22  | Unk. Hym            | II     | 10.5      | 2.08    | <0.35           | $\alpha\alpha/\alpha$ | No              | >60                             | Yes           | No              | Unknown            | No                   | No VIT                              | No      | No                                       | Rejected                                         |                        |
| 4           | M   | 43  | <i>Vespinae</i> spp | IV     | 11.3      | 1.00    | 3.09            | $\alpha\alpha/\beta$  | No              | 0-10                            | Yes           | No              | Unknown            | I (15 y ago)         | No VIT                              | Yes     | No                                       | 1 minor (MCs exhibit CD25)                       |                        |
| 5           | M   | 24  | <i>Honeybee</i>     | IV     | 11.8      | 5.95    | <0.35           | $\alpha\alpha/\alpha$ | No              | 0-10                            | Yes           | No              | Ah, CS             | No                   | No VIT                              | Yes     | No                                       | No SM criteria                                   |                        |
| 6           | F   | 43  | Unk. Hym            | I      | 12.4      | <0.35   | 12.9            | $\alpha\alpha/\beta$  | No              | 0-10                            | Yes           | No              | Ah, CS             | No                   | No VIT                              | No      | No                                       | Rejected                                         |                        |
| 7           | F   | 55  | Unk. Hym            | IV     | 12.4      | 0.56    | 4.54            | $\alpha\alpha/\alpha$ | No              | 0-10                            | No            | Yes             | Ah,CS              | Unknown              | No VIT                              | Yes     | No                                       | 1 minor (MCs exhibit CD25)                       |                        |
| 8           | M   | 57  | <i>Vespinae</i> spp | IV     | 13.3      | <0.35   | 19.9            | $\alpha\alpha/\beta$  | Yes             | 0-10                            | Yes           | No              | Ah, CS, Epi        | Unknown              | No VIT                              | Yes     | No                                       | ISM                                              |                        |
| 9           | M   | 64  | <i>Vespinae</i> spp | IV     | 13.3      | 0.7     | 7.38            | $\alpha\alpha/\alpha$ | Yes             | 0-10                            | Yes           | Yes             | Ah, CS, Epi        | No                   | No VIT                              | Yes     | No                                       | Rejected                                         |                        |
| 10          | F   | 57  | <i>Vespinae</i> spp | III    | 14.1      | <0.35   | 9.83            | $\alpha\alpha/\beta$  | No              | 0-10                            | Yes           | No              | Ah, CS, Epi        | No                   | No VIT                              | Yes     | Sleep disruption                         | Rejected                                         |                        |
| 11          | M   | 21  | <i>Vespinae</i> spp | II     | 14.2      | 1.66    | 3.16            | $\alpha\alpha/\beta$  | No              | 0-10                            | Yes           | No              | Ah, CS, Epi        | No                   | No VIT                              | No      | No                                       | Rejected                                         |                        |
| 12          | F   | 52  | <i>Vespinae</i> spp | III    | 14.2      | <0.35   | 1.42            | $\alpha\alpha/\alpha$ | No              | 0-10                            | No            | No              | Ah, CS             | No                   | No VIT                              | No      | No                                       | Rejected                                         |                        |
| 13          | M   | 60  | Unk. Hym            | IV     | 15.1      | 8.5     | <0.35           | $\alpha\alpha/\alpha$ | Yes             | 0-10                            | Yes           | Yes             | Ah, CS, Epi        | No                   | No-VIT                              | Yes     | Arthralgia, hypermobility                | No SM criteria                                   |                        |
| 14          | M   | 76  | <i>Vespinae</i> spp | I      | 15.1      | <0.35   | 1.28            | $\alpha\alpha/\alpha$ | No              | 0-10                            | Yes           | No              | Unknown            | No                   | No VIT                              | No      | No                                       | Rejected                                         |                        |
| 15          | M   | 68  | Unk. Hym            | IV     | 16.4      | <0.35   | 26.7            | $\alpha\alpha/\alpha$ | Yes             | 11-30                           | Yes           | No              | Ah, CS             | No                   | No VIT                              | Yes     | No                                       | 1 minor (spindle shaped MC)                      |                        |
| 16          | M   | 58  | <i>Vespinae</i> spp | IV     | 16.7      | 0.75    | 1.95            | $\alpha\alpha/\beta$  | No              | 11-30                           | Yes           | No              | Ah, CS, Epi        | No                   | No VIT                              | No      | Chronic gastroesophageal reflux symptoms | Rejected                                         |                        |
| 17          | M   | 69  | Unk. Hym            | IV     | 25.1      | 0.51    | 0.41            | $\alpha\alpha/\alpha$ | No              | 11-30                           | Yes           | Yes             | Unknown            | No                   | No VIT                              | Yes     | No                                       | 1 minor (MCs exhibit CD25)                       |                        |
| 18          | F   | 53  | <i>Vespinae</i> spp | IV     | 34.2      | <0.35   | 0.98            | $\alpha\alpha/\beta$  | No              | 11-30                           | Yes           | No              | Unknown            | No                   | No VIT                              | Yes     | No                                       | ISM                                              |                        |

Ah, Antihistamine (intravenous administration); CS, corticosteroid (intravenous administration); CVD, cardiovascular diseases; Epi, Epinephrine; HB, Honeybee; ISM, indolent systemic mastocytosis; slgE, specific IgE; Unk. Hym, unknown Hymenoptera insect; VIT, venom immunotherapy; YJ, yellow jacket.

\*Grades were assigned according to the Mueller grading system.<sup>E7</sup>
